# Supplementary material for: The Efficacy of Beta-Blockers in Patients With Long QT Syndrome 1–3 According to Individuals’ Gender, Age, and QTc Intervals: A Network Meta-analysis
Source: PubMed Central journal article supplement (PMC7768040; doi:10.3389/fphar.2020.579525), 2020-12-14
Supplement: table1.pdf [file table1.pdf]

**Table S1. Database search strategy**

|    |                                                                                                                                                                                                                                                                                                                                                                                                                                                                                                                                                                                                                                                                                                                                                                                                                                                                                                                                                                                                            |
|----|------------------------------------------------------------------------------------------------------------------------------------------------------------------------------------------------------------------------------------------------------------------------------------------------------------------------------------------------------------------------------------------------------------------------------------------------------------------------------------------------------------------------------------------------------------------------------------------------------------------------------------------------------------------------------------------------------------------------------------------------------------------------------------------------------------------------------------------------------------------------------------------------------------------------------------------------------------------------------------------------------------|
| #1 | Beta-blockers                                                                                                                                                                                                                                                                                                                                                                                                                                                                                                                                                                                                                                                                                                                                                                                                                                                                                                                                                                                              |
|    | <ul style="list-style-type: none"><li>• <u>Metoprolol</u><br/>'Toprol' OR 'Betaloc' OR 'Betaloc-Astra' OR 'Betaloc Astra' OR 'Betalok'<br/>OR 'CGP-2175' OR 'CGP 2175' OR 'CGP2175' OR 'H 93-26' OR 'H 93<br/>26' OR 'H 9326' OR 'Metoprolol Tartrate' OR 'Seloken' OR 'Spesikor' OR<br/>'Spesikor' OR 'Metoprolol Succinate' OR 'Metoprolol CR-XL' OR<br/>'Metoprolol CR XL' OR 'Toprol-XL' OR 'Toprol XL' OR 'Beloc-Duriles'<br/>OR 'Beloc Duriles' OR 'Lopressor'</li><li>• <u>Atenolol</u><br/>'Tenormine' OR 'Tenormin' OR 'ICI-66082' OR 'ICI 66082' OR<br/>'ICI66082'</li><li>• <u>Propranolol</u><br/>'Propanolol' OR 'Inderal' OR 'Avlocardyl' OR 'AY-20694' OR 'AY 20694'<br/>OR 'AY20694' OR 'Rexigen' OR 'Dexpropranolol' OR 'Dociton' OR<br/>'Obsidan' OR 'Obzidan' OR 'Propranolol Hydrochloride' OR<br/>'Hydrochloride, Propranolol' OR 'Anaprilin' OR 'Anapriline' OR<br/>'Betadren'</li><li>• <u>Nadolol</u><br/>'SQ-11725' OR 'SQ 11725' OR 'SQ11725' OR 'Corgard' OR 'Solgol'</li></ul> |
| #2 | Long QT syndrome<br>'Electrocardiogram QT Prolonged' OR 'Romano-Ward Syndrome' OR<br>'Romano Ward Syndrome' OR 'Syndrome, Romano-Ward' OR 'Ventricular<br>Fibrillation with Prolonged QT Interval' OR 'Long QT Syndrome Type 1' OR 'Long<br>QT Syndrome 1' OR 'Ward-Romano Syndrome' OR 'Syndrome, Ward-Romano'<br>OR 'Ward Romano Syndrome'                                                                                                                                                                                                                                                                                                                                                                                                                                                                                                                                                                                                                                                               |
| #3 | RCT<br>'Randomized Controlled Trial' OR 'Controlled Clinical Trial' OR<br>'randomized':ti,ab OR 'placebo':ti,ab OR 'randomly':ti,ab OR 'trial':ti,ab OR<br>'groups':ti,ab OR 'drug therapy':lnk                                                                                                                                                                                                                                                                                                                                                                                                                                                                                                                                                                                                                                                                                                                                                                                                            |
|    | #1 and # 2 and #3                                                                                                                                                                                                                                                                                                                                                                                                                                                                                                                                                                                                                                                                                                                                                                                                                                                                                                                                                                                          |
|    | <b>Total number:</b> PUBMED 37 + EMBASE 159 + CENTRAL 16 + OVID 187 = 399<br><b>Additional records identified through manual search: 3</b><br><b>Duplication: 77</b><br><b>Record excluded based on title, abstract, and detailed evaluation: 309</b><br><b>Final total number: 16</b>                                                                                                                                                                                                                                                                                                                                                                                                                                                                                                                                                                                                                                                                                                                     |
